# Supplementary material for: A comprehensive study of Z-DNA density and its evolutionary implications in birds
Source: PubMed Central journal article supplement (PMC11580473; doi:10.1186/s12864-024-11039-x), 2024-11-21
Supplement: 12864_2024_11039_MOESM1_ESM.pdf [file 12864_2024_11039_MOESM1_ESM.pdf]

**SUPPLEMENTARY TABLES**

**Table S1. Detail information of Z-DNA motifs predicted on nBMST. ZP1 in chickens and TG19 in Pigeon show high similarity to each other in length, composition and sequence.**

| <b>Chicken</b> |        |        |                                                  |       |
|----------------|--------|--------|--------------------------------------------------|-------|
| Name           | Length | Repeat | Sequence                                         | Score |
| ZP1            | 40     | TG     | TGTGTGTGTGTGTGTGTGTGTGTGT<br>GTGTGTGTGTGTGTGTGCG | 80    |
| ZP3            | 14     | CA     | CACACACACACA                                     | 19    |
| ZP6            | 25     | TG     | GTGCGTGTGCACGTGTGTGTGC<br>ACA                    | 91    |
| ZP7            | 12     | CA     | CACGCACACACA                                     | 38    |
| ZP4            | 22     | TG     | CACGTGTGTGTGTGCGTGTGCA                           | 75    |
| <b>Pigeon</b>  |        |        |                                                  |       |
| Name           | Length | Repeat | Sequence                                         | Score |
| TG19           | 38     | TG     | GTGTGTGTGTGTGTGTGCGTGTGTG<br>TGCGCACACACGTGT     | 121   |
| 1              | 19     | CA     | ACGCACGCACGCACACACA                              | 93    |
| 2              | 17     | CA     | ACACACACACGCACACA                                | 46    |
| 3              | 14     | CA     | ACACACACACACAC                                   | 19    |

|   |    |    |                      |    |
|---|----|----|----------------------|----|
| 4 | 20 | TG | TGTGTGTGTGTGTGTGCGCA | 61 |
| 5 | 12 | CA | GCACACGCACGC         | 71 |

**Table S2. Phylogenetic linear regression model fitting result of Z-DNA density and predictors.**

| Predictor   | Model  | All species |        |         | Non-Passeriformes |       |         | Passeriformes |       |         |
|-------------|--------|-------------|--------|---------|-------------------|-------|---------|---------------|-------|---------|
|             |        | logLik      | AIC    | AICw    | logLik            | AIC   | AICw    | logLik        | AIC   | AICw    |
| Genome size | BM     | -708.6      | 1423.3 | 0       | -349.7            | 705.4 | 0.00087 | -276.7        | 559.5 | 0       |
|             | OU     | -649.7      | 1307.4 | 0.04109 | -349.2            | 706.5 | 0.0005  | -257.5        | 523.1 | 0.84553 |
|             | lambda | -646.5      | 1301.1 | 0.95891 | -341.6            | 691.3 | 0.99863 | -259.3        | 526.5 | 0.15447 |
| Body mass   | BM     | -710.9      | 1427.9 | 0       | -353.1            | 712.3 | 0       | -283.0        | 571.9 | 0       |
|             | OU     | -649.9      | 1307.9 | 0.99797 | -349.2            | 706.5 | 0.00006 | -265.5        | 539.0 | 0.96267 |
|             | lambda | -656.2      | 1320.3 | 0.00203 | -339.4            | 686.9 | 0.99994 | -268.7        | 545.5 | 0.03733 |
| Egg mass    | BM     | -576        | 1158   | 0       | -282.4            | 570.8 | 0.03269 | -212.1        | 430.3 | 0       |
|             | OU     | -520.7      | 1049.4 | 0.99894 | -279.0            | 566.1 | 0.34276 | -198.4        | 404.7 | 0.92414 |
|             | lambda | -527.5      | 1063.1 | 0.00106 | -278.4            | 564.9 | 0.62455 | -200.8        | 409.7 | 0.07586 |
| Deve_T      | BM     | -602.8      | 1211.5 | 0       | -290.6            | 587.2 | 0.17979 | -230.8        | 467.7 | 0       |
|             | OU     | -550        | 1108   | 0.99683 | -290.2            | 588.3 | 0.12669 | -214.4        | 436.9 | 0.8909  |
|             | lambda | -555.7      | 1119.5 | 0.00317 | -288.4            | 584.9 | 0.69352 | -216.6        | 441.1 | 0.1091  |
| Incu_T      | BM     | -602.5      | 1211.0 | 0       | -290              | 586   | 0.18214 | -231.3        | 468.7 | 0       |
|             | OU     | -548.1      | 1104.1 | 0.99842 | -289              | 586   | 0.18214 | -215.5        | 439.0 | 0.94268 |
|             | lambda | -554.5      | 1117.0 | 0.00158 | -287.7            | 583.5 | 0.63572 | -218.3        | 444.6 | 0.05732 |
| Fled_T      | BM     | -602.8      | 1211.5 | 0       | -291              | 588   | 0.20761 | -230.0        | 466.1 | 0       |
|             | OU     | -551.2      | 1110.4 | 0.99223 | -290.7            | 589.4 | 0.1031  | -213.6        | 435.3 | 0.86989 |

|                |        |        |        |         |        |       |         |        |       |         |
|----------------|--------|--------|--------|---------|--------|-------|---------|--------|-------|---------|
|                | lambda | -556.1 | 1120.1 | 0.00777 | -288.8 | 585.6 | 0.68929 | -215.6 | 439.1 | 0.13011 |
| Deve_T         | BM     | -600.6 | 1207.2 | 0       | -290.5 | 587.0 | 0.03062 | -228.7 | 463.4 | 0       |
| (bodymass_adj) | OU     | -544.7 | 1097.4 | 0.99932 | -288.4 | 584.7 | 0.0967  | -215.2 | 438.4 | 0.95026 |
|                | lambda | -552   | 1112   | 0.00068 | -286.2 | 580.3 | 0.87269 | -218.2 | 444.3 | 0.04974 |
| Incu_T         | BM     | -601   | 1208   | 0       | -290.1 | 586.1 | 0.04673 | -229.5 | 465.0 | 0       |
| (bodymass_adj) | OU     | -545.5 | 1098.9 | 0.99942 | -288.3 | 584.5 | 0.104   | -215.5 | 438.9 | 0.95026 |
|                | lambda | -552.9 | 1113.8 | 0.00058 | -286.1 | 580.3 | 0.84927 | -218.4 | 444.8 | 0.04974 |
| Fled_T         | BM     | -600.4 | 1206.8 | 0       | -291.2 | 588.4 | 0.03243 | -227.8 | 461.6 | 0       |
| (bodymass_adj) | OU     | -544.4 | 1096.7 | 0.99913 | -289.2 | 586.4 | 0.08817 | -214.8 | 437.6 | 0.95026 |
|                | lambda | -551.4 | 1110.8 | 0.00087 | -286.9 | 581.8 | 0.8794  | -217.8 | 443.5 | 0.04974 |
| Deve_T         | BM     | -575.5 | 1157.0 | 0       | -283.9 | 573.9 | 0.01131 | -211.1 | 428.3 | 0       |
| (eggmass_adj)  | OU     | -519   | 1046   | 0.99877 | -279.6 | 567.3 | 0.30652 | -197.7 | 403.5 | 0.91293 |
|                | lambda | -525.7 | 1059.4 | 0.00123 | -278.9 | 565.7 | 0.68217 | -200.1 | 408.2 | 0.08707 |
| Incu_T         | BM     | -575.8 | 1157.6 | 0       | -282.8 | 571.7 | 0.0201  | -212.1 | 430.2 | 0       |
| (eggmass_adj)  | OU     | -520   | 1048   | 0.99909 | -279.1 | 566.2 | 0.31437 | -198.2 | 404.5 | 0.92056 |
|                | lambda | -527   | 1062   | 0.00091 | -278.4 | 564.7 | 0.66553 | -200.7 | 409.4 | 0.07944 |
| Fled_T         | BM     | -575.6 | 1157.2 | 0       | -285   | 576   | 0.02859 | -210.2 | 426.4 | 0       |
| (eggmass_adj)  | OU     | -519   | 1046   | 0.99797 | -282.3 | 572.6 | 0.1565  | -197.1 | 402.1 | 0.90887 |
|                | lambda | -525.2 | 1058.4 | 0.00203 | -280.7 | 569.3 | 0.81491 | -199.3 | 406.7 | 0.09112 |

**Table S3. Phylogenetic linear regression model fitting result of STR density and predictors.**

| Predictor   | Model  | All species |        |      | Non-Passeriformes |        |         | Passeriformes |       |         |
|-------------|--------|-------------|--------|------|-------------------|--------|---------|---------------|-------|---------|
|             |        | logLik      | AIC    | AICw | logLik            | AIC    | AICw    | logLik        | AIC   | AICw    |
| Genome size | BM     | -973.1      | 1952.2 | 0    | -624.2            | 1254.5 | 0       | -340.3        | 686.6 | 0.00001 |
|             | OU     | -951.3      | 1910.6 | 0    | -604.3            | 1216.6 | 0.00003 | -332.1        | 672.2 | 0.01799 |
|             | lambda | -932.8      | 1873.6 | 1    | -593.9            | 1195.7 | 0.99997 | -328.1        | 664.2 | 0.982   |
| Body mass   | BM     | -967.7      | 1941.4 | 0    | -624.3            | 1254.6 | 0       | -337.2        | 680.4 | 0.00001 |
|             | OU     | -945.7      | 1899.3 | 0    | -604.4            | 1216.9 | 0.00003 | -327.4        | 662.9 | 0.09112 |
|             | lambda | -928.7      | 1865.5 | 1    | -594              | 1196   | 0.99997 | -325.2        | 658.3 | 0.90886 |
| Egg mass    | BM     | -777.5      | 1561.0 | 0    | -522.6            | 1051.3 | 0       | -251.4        | 508.9 | 0.00001 |
|             | OU     | -757.1      | 1522.2 | 0    | -506.3            | 1020.5 | 0.00015 | -239.9        | 487.8 | 0.51249 |
|             | lambda | -743.8      | 1495.6 | 1    | -497.4            | 1002.9 | 0.99985 | -239.9        | 487.9 | 0.4875  |
| Deve_T      | BM     | -812.6      | 1631.2 | 0    | -535.2            | 1076.4 | 0       | -273.0        | 552.1 | 0.00002 |
|             | OU     | -791.8      | 1591.6 | 0    | -517.7            | 1043.4 | 0.00014 | -261.7        | 531.3 | 0.57443 |
|             | lambda | -777.7      | 1563.4 | 1    | -508.8            | 1025.6 | 0.99986 | -262.0        | 531.9 | 0.42555 |
| Incu_T      | BM     | -812.3      | 1630.6 | 0    | -535.3            | 1076.6 | 0       | -272.1        | 550.2 | 0.00002 |
|             | OU     | -791.9      | 1591.7 | 0    | -518              | 1044   | 0.00012 | -260.9        | 529.7 | 0.52497 |
|             | lambda | -777.9      | 1563.7 | 1    | -509              | 1026   | 0.99988 | -261.0        | 529.9 | 0.47501 |
| Fled_T      | BM     | -812.5      | 1631.0 | 0    | -535.1            | 1076.3 | 0       | -273.3        | 552.5 | 0.00002 |
|             | OU     | -791.7      | 1591.4 | 0    | -517.6            | 1043.2 | 0.00014 | -262.3        | 532.5 | 0.43781 |

|                |        |        |        |   |        |        |         |        |       |         |
|----------------|--------|--------|--------|---|--------|--------|---------|--------|-------|---------|
|                | lambda | -777.7 | 1563.3 | 1 | -508.8 | 1025.5 | 0.99986 | -262   | 532   | 0.56217 |
| Deve_T         | BM     | -812.6 | 1631.2 | 0 | -535.3 | 1076.7 | 0       | -273.4 | 552.7 | 0.00003 |
| (bodymass_adj) | OU     | -791.8 | 1591.6 | 0 | -518.1 | 1044.2 | 0.00011 | -263.1 | 534.1 | 0.3318  |
|                | lambda | -777.9 | 1563.7 | 1 | -509   | 1026   | 0.99989 | -262.3 | 532.7 | 0.66817 |
| Incu_T         | BM     | -812.6 | 1631.2 | 0 | -535.3 | 1076.6 | 0       | -273.4 | 552.7 | 0.00003 |
| (bodymass_adj) | OU     | -791.8 | 1591.7 | 0 | -518.1 | 1044.1 | 0.00011 | -263.0 | 534.1 | 0.3318  |
|                | lambda | -777.9 | 1563.7 | 1 | -508.9 | 1025.8 | 0.99989 | -262.3 | 532.7 | 0.66817 |
| Fled_T         | BM     | -812.6 | 1631.1 | 0 | -535.3 | 1076.6 | 0       | -273.4 | 552.7 | 0.00003 |
| (bodymass_adj) | OU     | -791.7 | 1591.4 | 0 | -518.1 | 1044.2 | 0.00011 | -263.1 | 534.1 | 0.3318  |
|                | lambda | -777.9 | 1563.7 | 1 | -509   | 1026   | 0.99989 | -262.3 | 532.7 | 0.66817 |
| Deve_T         | BM     | -777.5 | 1561.0 | 0 | -522.6 | 1051.3 | 0       | -251.3 | 508.5 | 0.00002 |
| (eggmass_adj)  | OU     | -757   | 1522   | 0 | -506.2 | 1020.5 | 0.00015 | -240.2 | 488.4 | 0.45016 |
|                | lambda | -743.8 | 1495.5 | 1 | -497.4 | 1002.9 | 0.99985 | -240   | 488   | 0.54982 |
| Incu_T         | BM     | -777.4 | 1560.9 | 0 | -522.6 | 1051.2 | 0       | -251.2 | 508.4 | 0.00002 |
| (eggmass_adj)  | OU     | -757.1 | 1522.2 | 0 | -506.3 | 1020.5 | 0.00015 | -240.1 | 488.3 | 0.46256 |
|                | lambda | -743.8 | 1495.6 | 1 | -497.5 | 1002.9 | 0.99985 | -240   | 488   | 0.53742 |
| Fled_T         | BM     | -777.5 | 1560.9 | 0 | -522.6 | 1051.2 | 0       | -251.3 | 508.6 | 0.00002 |
| (eggmass_adj)  | OU     | -756.9 | 1521.9 | 0 | -506.2 | 1020.4 | 0.00016 | -240.2 | 488.4 | 0.45016 |
|                | lambda | -743.7 | 1495.5 | 1 | -497.4 | 1002.9 | 0.99984 | -240   | 488   | 0.54982 |

**Table S4. Phylogenetic linear regression model fitting result of genome size and developmental periods.**

| Predictor                | Model  | All species |        |         | Non-Passeriformes |       |         | Passeriformes |       |         |
|--------------------------|--------|-------------|--------|---------|-------------------|-------|---------|---------------|-------|---------|
|                          |        | logLik      | AIC    | AICw    | logLik            | AIC   | AICw    | logLik        | AIC   | AICw    |
| Deve_T                   | BM     | -787.9      | 1581.9 | 0       | -491.2            | 988.5 | 0       | -287.9        | 581.9 | 0       |
|                          | OU     | -758.9      | 1525.8 | 0.00106 | -479.6            | 967.3 | 0.00015 | -273          | 554   | 0.6981  |
|                          | lambda | -752.1      | 1512.1 | 0.99894 | -470.9            | 949.7 | 0.99985 | -273.8        | 555.7 | 0.3019  |
| Incu_T                   | BM     | -787        | 1580   | 0       | -491.2            | 988.4 | 0       | -287.3        | 580.7 | 0       |
|                          | OU     | -755.6      | 1519.2 | 0.00067 | -476.9            | 961.8 | 0.00017 | -273.6        | 555.2 | 0.82252 |
|                          | lambda | -748.3      | 1504.6 | 0.99933 | -468.2            | 944.4 | 0.99983 | -275.1        | 558.2 | 0.17748 |
| Fled_T                   | BM     | -787.1      | 1580.2 | 0       | -490.5            | 986.9 | 0       | -287.2        | 580.4 | 0       |
|                          | OU     | -761.7      | 1531.5 | 0.00017 | -480.4            | 968.9 | 0.0001  | -272.4        | 552.8 | 0.67264 |
|                          | lambda | -753.1      | 1514.2 | 0.99983 | -471.2            | 950.4 | 0.9999  | -273.1        | 554.2 | 0.32736 |
| Deve_T<br>(bodymass_adj) | BM     | -787.9      | 1581.9 | 0       | -491.5            | 989.0 | 0       | -287.2        | 580.5 | 0       |
|                          | OU     | -761.1      | 1530.2 | 0.00007 | -479.9            | 967.8 | 0.00013 | -273          | 554   | 0.88471 |
|                          | lambda | -751.6      | 1511.2 | 0.99993 | -471              | 950   | 0.99987 | -275.0        | 558.1 | 0.11529 |
| Incu_T<br>(bodymass_adj) | BM     | -788.1      | 1582.2 | 0       | -491.2            | 988.3 | 0       | -287.6        | 581.3 | 0       |
|                          | OU     | -761.3      | 1530.6 | 0.0001  | -480.1            | 968.2 | 0.00013 | -273.3        | 554.6 | 0.87451 |
|                          | lambda | -752.1      | 1512.2 | 0.9999  | -471.1            | 950.3 | 0.99987 | -275.2        | 558.5 | 0.12549 |
| Fled_T<br>(bodymass_adj) | BM     | -787.5      | 1581.0 | 0       | -491.6            | 989.3 | 0       | -286.7        | 579.4 | 0       |
|                          | OU     | -761        | 1530   | 0.00005 | -479.7            | 967.4 | 0.00013 | -272.6        | 553.2 | 0.88848 |

|               |        |        |        |         |        |       |         |        |       |         |
|---------------|--------|--------|--------|---------|--------|-------|---------|--------|-------|---------|
|               | lambda | -751   | 1510   | 0.99995 | -470.7 | 949.5 | 0.99987 | -274.7 | 557.3 | 0.11152 |
| Deve_T        | BM     | -752.7 | 1511.4 | 0       | -479.3 | 964.5 | 0       | -264.8 | 535.6 | 0       |
| (eggmass_adj) | OU     | -724.3 | 1456.6 | 0.0001  | -466.5 | 941.1 | 0.00024 | -250.3 | 508.6 | 0.81813 |
|               | lambda | -715.1 | 1438.2 | 0.9999  | -458.2 | 924.5 | 0.99976 | -251.8 | 511.6 | 0.18187 |
| Incu_T        | BM     | -753.6 | 1513.1 | 0       | -479.9 | 965.8 | 0       | -265.1 | 536.1 | 0       |
| (eggmass_adj) | OU     | -724.4 | 1456.9 | 0.00027 | -467.1 | 942.2 | 0.00032 | -250.8 | 509.6 | 0.83061 |
|               | lambda | -716.2 | 1440.4 | 0.99973 | -459.0 | 926.1 | 0.99968 | -252.4 | 512.7 | 0.16939 |
| Fled_T        | BM     | -751.8 | 1509.5 | 0       | -478.5 | 963.0 | 0       | -264.3 | 534.6 | 0       |
| (eggmass_adj) | OU     | -724.6 | 1457.2 | 0.0004  | -466.3 | 940.7 | 0.00017 | -249.7 | 507.4 | 0.77891 |
|               | lambda | -714.4 | 1436.7 | 0.9996  | -457.6 | 923.3 | 0.99983 | -250.9 | 509.9 | 0.22109 |

**Table S6. Accession ID of genomes that were included in the analysis.**

| <b>Species</b>              | <b>accession ID</b> | <b>Species</b>                  | <b>accession ID</b> | <b>Species</b>                     | <b>accession ID</b> |
|-----------------------------|---------------------|---------------------------------|---------------------|------------------------------------|---------------------|
| <i>Acanthisitta chloris</i> | GCA_016904835.1     | <i>Cyanistes caeruleus</i>      | GCF_002901205.1     | <i>Nothoprocta perdicaria</i>      | GCF_003342845.1     |
| <i>Accipiter gentilis</i>   | GCF_929443795.1     | <i>Cyanocitta stelleri</i>      | GCA_026167965.1     | <i>Numida meleagris</i>            | GCF_002078875.1     |
| <i>Acridotheres tristis</i> | GCA_027559615.1     | <i>Cygnus atratus</i>           | GCF_013377495.2     | <i>Nyctibius grandis</i>           | GCA_013368605.1     |
| <i>Agelaius phoeniceus</i>  | GCF_020745825.1     | <i>Cygnus olor</i>              | GCF_009769625.2     | <i>Oenanthe melanoleuca</i>        | GCF_029582105.1     |
| <i>Alca torda</i>           | GCA_008658365.1     | <i>Diglossa brunneiventris</i>  | GCA_019023105.1     | <i>Onychostruthus taczanowskii</i> | GCF_017590055.1     |
| <i>Alectoris rufa</i>       | GCA_019345075.1     | <i>Dromaius novaehollandiae</i> | GCA_016128335.2     | <i>Opisthocomus hoazin</i>         | GCF_000692075.1     |
| <i>Amazona aestiva</i>      | GCA_017639355.1     | <i>Dryobates pubescens</i>      | GCF_014839835.1     | <i>Oxyura jamaicensis</i>          | GCF_011077185.1     |
| <i>Ammospiza caudacuta</i>  | GCF_027887145.1     | <i>Egretta garzetta</i>         | GCF_000687185.1     | <i>Parus major</i>                 | GCF_001522545.3     |
| <i>Ammospiza nelsoni</i>    | GCF_027579445.1     | <i>Empidonax traillii</i>       | GCF_003031625.1     | <i>Passer montanus</i>             | GCF_014805655.1     |
| <i>Anas platyrhynchos</i>   | GCF_015476345.1     | <i>Erithacus rubecula</i>       | GCA_903797595.2     | <i>Passerculus sandwichensis</i>   | GCA_022577445.1     |
| <i>Anser cygnoides</i>      | GCA_013030995.1     | <i>Falco biarmicus</i>          | GCF_023638135.1     | <i>Pavo muticus</i>                | GCA_016647715.1     |
| <i>Apaloderma vittatum</i>  | GCF_000703405.1     | <i>Falco cherrug</i>            | GCF_023634085.1     | <i>Pelecanus crispus</i>           | GCA_030463565.1     |



|                               |                 |                                 |                 |                                  |                 |
|-------------------------------|-----------------|---------------------------------|-----------------|----------------------------------|-----------------|
| <i>Aphelocoma californica</i> | GCA_028536675.1 | <i>Falco naumanni</i>           | GCF_017639655.2 | <i>Pezoporus wallicus</i>        | GCF_028554395.1 |
| <i>Aptenodytes forsteri</i>   | GCF_000699145.1 | <i>Falco peregrinus</i>         | GCF_023634155.1 | <i>Phaethornis superciliosus</i> | GCA_023637945.1 |
| <i>Apteryx mantelli</i>       | GCF_001039765.1 | <i>Falco rusticolus</i>         | GCF_015220075.1 | <i>Phasianus colchicus</i>       | GCF_004143745.1 |
| <i>Apteryx rowi</i>           | GCF_003343035.1 | <i>Ficedula albicollis</i>      | GCF_000247815.1 | <i>Phoenicopterus ruber</i>      | GCA_009819775.1 |
| <i>Apus apus</i>              | GCF_020740795.1 | <i>Fulmarus glacialis</i>       | GCF_000690835.1 | <i>Pipra filicauda</i>           | GCF_003945595.2 |
| <i>Aquila chrysaetos</i>      | GCF_900496995.4 | <i>Gallus gallus</i>            | GCA_027408225.1 | <i>Phuvialis apricaria</i>       | GCA_017639485.1 |
| <i>Aratinga solstitialis</i>  | GCA_902168055.1 | <i>Geospiza fortis</i>          | GCF_000277835.1 | <i>Podargus strigoides</i>       | GCA_028020825.1 |
| <i>Artemisiospiza belli</i>   | GCA_021963965.1 | <i>Geothlypis trichas</i>       | GCA_009764595.1 | <i>Poecile atricapillus</i>      | GCF_030490865.1 |
| <i>Athene cunicularia</i>     | GCF_003259725.1 | <i>Grus americana</i>           | GCF_028858705.1 | <i>Pogoniulus pusillus</i>       | GCA_015220805.1 |
| <i>Aythya fuligula</i>        | GCF_009819795.1 | <i>Gymnogyps californianus</i>  | GCF_018139145.2 | <i>Porphyrio hochstetteri</i>    | GCA_020800305.1 |
| <i>Balearica regulorum</i>    | GCF_000709895.1 | <i>Gypaetus barbatus</i>        | GCA_028022735.1 | <i>Pseudopodoces humilis</i>     | GCF_000331425.1 |
| <i>Branta canadensis</i>      | GCA_006130075.1 | <i>Haemorhous mexicanus</i>     | GCA_027477595.1 | <i>Pterocles gutturalis</i>      | GCA_009769525.1 |
| <i>Bucorvus abyssinicus</i>   | GCA_009769605.1 | <i>Haliaeetus albicilla</i>     | GCA_947461875.1 | <i>Pygoscelis adeliae</i>        | GCF_000699105.1 |
| <i>Calidris pugnax</i>        | GCF_001431845.1 | <i>Haliaeetus leucocephalus</i> | GCF_000737465.1 | <i>Pyrgilauda ruficollis</i>     | GCF_017590135.1 |
| <i>Callipepla</i>             | GCA_023055505.1 | <i>Harpia harpyja</i>           | GCF_026419915.1 | <i>Rallus limicola</i>           | GCA_022605955.1 |

|                                  |                 |                                |                 |                             |                 |
|----------------------------------|-----------------|--------------------------------|-----------------|-----------------------------|-----------------|
| <i>californica</i>               |                 |                                |                 |                             |                 |
| <i>Calypte anna</i>              | GCF_003957555.1 | <i>Hemiprocne comata</i>       | GCA_020745705.1 | <i>Rhea americana</i>       | GCA_003343005.1 |
| <i>Camarhynchus parvulus</i>     | GCA_902806625.1 | <i>Hirundo rustica</i>         | GCF_015227805.2 | <i>Rhea pennata</i>         | GCA_028389875.1 |
| <i>Caprimulgus europaeus</i>     | GCA_907165065.1 | <i>Indicator indicator</i>     | GCF_027791375.1 | <i>Rhynchotos jubatus</i>   | GCA_027574665.1 |
| <i>Cariama cristata</i>          | GCA_009819825.1 | <i>Lagopus leucura</i>         | GCF_019238085.1 | <i>Rissa tridactyla</i>     | GCA_028501385.1 |
| <i>Catharus ustulatus</i>        | GCF_009819885.2 | <i>Lagopus muta</i>            | GCF_023343835.1 | <i>Serinus canaria</i>      | GCF_022539315.1 |
| <i>Centrocercus urophasianus</i> | GCF_019232065.1 | <i>Laterallus jamaicensis</i>  | GCA_022605575.1 | <i>Setophaga petechia</i>   | GCA_024362935.1 |
| <i>Chaetura pelagica</i>         | GCF_000747805.2 | <i>Lepidothrix coronata</i>    | GCF_001604755.1 | <i>Spheniscus humboldti</i> | GCA_027474245.1 |
| <i>Chamaea fasciata</i>          | GCA_029207755.1 | <i>Lonchura striata</i>        | GCF_005870125.1 | <i>Sterna hirundo</i>       | GCA_009819605.1 |
| <i>Charadrius vociferus</i>      | GCF_000708025.1 | <i>Lycocorax pyrrhopterus</i>  | GCA_014706295.1 | <i>Streptopelia turtur</i>  | GCA_901699155.2 |
| <i>Chiroxiphia lanceolata</i>    | GCF_009829145.1 | <i>Malurus melanocephalus</i>  | GCF_030028575.1 | <i>Strigops habroptila</i>  | GCF_004027225.2 |
| <i>Chlamydotis macqueenii</i>    | GCF_000695195.1 | <i>Manacus candei</i>          | GCF_025592945.1 | <i>Struthio camelus</i>     | GCF_000698965.1 |
| <i>Chrysolophus pictus</i>       | GCA_003413605.1 | <i>Manacus vitellinus</i>      | GCF_001715985.3 | <i>Sturnus vulgaris</i>     | GCF_001447265.1 |
| <i>Ciconia maguari</i>           | GCA_017639555.1 | <i>Melanerpes formicivorus</i> | GCA_026170545.1 | <i>Sylvia atricapilla</i>   | GCA_009819655.1 |

|                                  |                 |                                |                 |                                 |                 |
|----------------------------------|-----------------|--------------------------------|-----------------|---------------------------------|-----------------|
| <i>Colinus virginianus</i>       | GCA_008692595.2 | <i>Meleagris gallopavo</i>     | GCA_905368555.1 | <i>Sylvia borin</i>             | GCA_014839755.1 |
| <i>Coloeus monedula</i>          | GCA_013407035.1 | <i>Melospittacus undulatus</i> | GCF_000238935.1 | <i>Taeniopygia guttata</i>      | GCF_003957565.2 |
| <i>Columba livia</i>             | GCF_000337935.1 | <i>Melospiza georgiana</i>     | GCF_028018845.1 | <i>Tauraco erythrolophus</i>    | GCA_009769465.1 |
| <i>Corapipo altera</i>           | GCF_003945725.1 | <i>Melospiza melodia</i>       | GCA_022749695.1 | <i>Theristicus caerulescens</i> | GCA_020745775.1 |
| <i>Corvus brachyrhynchos</i>     | GCF_000691975.1 | <i>Melozone crissalis</i>      | GCF_028551555.1 | <i>Trogon surrucura</i>         | GCA_020746105.1 |
| <i>Corvus cornix</i>             | GCF_000738735.6 | <i>Merops nubicus</i>          | GCA_009819595.1 | <i>Tympanuchus cupido</i>       | GCA_001870855.1 |
| <i>Corvus hawaiiensis</i>        | GCF_020740725.1 | <i>Molothrus ater</i>          | GCF_012460135.2 | <i>Tyto alba</i>                | GCF_018691265.1 |
| <i>Corvus kubaryi</i>            | GCF_017639235.1 | <i>Motacilla alba</i>          | GCF_015832195.1 | <i>Vidua chalybeata</i>         | GCA_026979565.1 |
| <i>Corvus moneduloides</i>       | GCF_009650955.1 | <i>Myiopsitta monachus</i>     | GCA_017639245.1 | <i>Vidua macroura</i>           | GCF_024509145.1 |
| <i>Coturnix japonica</i>         | GCF_001577835.2 | <i>Myiozetetes cayanensis</i>  | GCF_022539395.1 | <i>Zonotrichia albicollis</i>   | GCF_000385455.1 |
| <i>Crossoptilon mantchuricum</i> | GCA_019593555.1 | <i>Neopelma chrysocephalum</i> | GCF_003984885.1 |                                 |                 |
| <i>Cuculus canorus</i>           | GCF_017976375.1 | <i>Nestor notabilis</i>        | GCF_000696875.1 |                                 |                 |

**Table S7. Whole genome Z-DNA density and STR density of 154 avian species.**

| <b>Species</b>              | <b>D_zdna</b> | <b>D_STR</b> | <b>Species</b>                  | <b>D_zdna</b> | <b>D_STR</b> | <b>Species</b>                     | <b>D_zdna</b> | <b>D_STR</b> |
|-----------------------------|---------------|--------------|---------------------------------|---------------|--------------|------------------------------------|---------------|--------------|
| <i>Acanthisitta chloris</i> | 101.3787      | 539.7981     | <i>Cyanistes caeruleus</i>      | 77.2479       | 631.5437     | <i>Nothoprocta perdicaria</i>      | 134.8876      | 865.8691     |
| <i>Accipiter gentilis</i>   | 106.5386      | 781.3964     | <i>Cyanocitta stelleri</i>      | 88.69569      | 679.25       | <i>Numida meleagris</i>            | 97.225        | 712.4837     |
| <i>Acridotheres tristis</i> | 84.41681      | 997.7168     | <i>Cygnus atratus</i>           | 113.3116      | 1052.294     | <i>Nyctibius grandis</i>           | 102.0341      | 631.2333     |
| <i>Agelaius phoeniceus</i>  | 92.69496      | 728.2655     | <i>Cygnus olor</i>              | 111.4434      | 1046.684     | <i>Oenanthe melanoleuca</i>        | 96.57692      | 800.2058     |
| <i>Alca torda</i>           | 114.5432      | 778.8669     | <i>Diglossa brunneiventris</i>  | 97.01759      | 709.7463     | <i>Onychostruthus taczanowskii</i> | 90.94369      | 725.7709     |
| <i>Alectoris rufa</i>       | 93.87379      | 833.4039     | <i>Dromaius novaehollandiae</i> | 136.8144      | 687.9952     | <i>Opisthocomus hoazin</i>         | 100.2317      | 518.4233     |
| <i>Amazona aestiva</i>      | 77.21239      | 522.0115     | <i>Dryobates pubescens</i>      | 86.47563      | 828.4731     | <i>Oxyura jamaicensis</i>          | 107.4374      | 1098.908     |
| <i>Ammospiza caudacuta</i>  | 152.3073      | 716.8774     | <i>Egretta garzetta</i>         | 100.4934      | 660.1934     | <i>Parus major</i>                 | 83.22941      | 655.5696     |

|                               |          |          |                            |          |          |                                  |          |          |
|-------------------------------|----------|----------|----------------------------|----------|----------|----------------------------------|----------|----------|
| <i>Ammospiza nelsoni</i>      | 125.1958 | 708.2992 | <i>Empidonax traillii</i>  | 92.75536 | 736.2411 | <i>Passer montanus</i>           | 89.7625  | 671.6817 |
| <i>Anas platyrhynchos</i>     | 117.9412 | 1125.187 | <i>Erithacus rubecula</i>  | 90.62385 | 778.1633 | <i>Passerculus sandwichensis</i> | 144.5557 | 746.2974 |
| <i>Anser cygnoides</i>        | 115.9811 | 1042.02  | <i>Falco biarmicus</i>     | 108.307  | 688.8326 | <i>Pavo muticus</i>              | 94.89057 | 694.4472 |
| <i>Apaloderma vittatum</i>    | 91.82617 | 598.1486 | <i>Falco cherrug</i>       | 102.658  | 663.4733 | <i>Pelecanus crispus</i>         | 117.0511 | 754.8863 |
| <i>Aphelocoma californica</i> | 105.1785 | 672.5726 | <i>Falco naumanni</i>      | 111.4016 | 715.6713 | <i>Pezoporus wallicus</i>        | 96.34298 | 660.0649 |
| <i>Aptenodytes forsteri</i>   | 104.552  | 636.4704 | <i>Falco peregrinus</i>    | 112.7908 | 1230.03  | <i>Phaethornis superciliosus</i> | 84.83235 | 870.8873 |
| <i>Apteryx mantelli</i>       | 113.3507 | 586.373  | <i>Falco rusticolus</i>    | 109.6333 | 699.9942 | <i>Phasianus colchicus</i>       | 96.67353 | 822.1176 |
| <i>Apteryx rowi</i>           | 127.6911 | 684.4626 | <i>Ficedula albicollis</i> | 88.93482 | 773.0848 | <i>Phoenicopterus ruber</i>      | 122.3864 | 675.2984 |
| <i>Apus apus</i>              | 90.98    | 721.6    | <i>Fulmarus glacialis</i>  | 101.9167 | 643.5798 | <i>Pipra filicauda</i>           | 95.89722 | 658.4315 |
| <i>Aquila chrysaetos</i>      | 105.2398 | 740.5545 | <i>Gallus gallus</i>       | 102.2288 | 845.8766 | <i>Pluvialis apricaria</i>       | 111.192  | 707.3552 |
| <i>Aratinga solstitialis</i>  | 85.30684 | 584.206  | <i>Geospiza fortis</i>     | 84.85047 | 607.5065 | <i>Podargus strigoides</i>       | 139.1528 | 1353.887 |
| <i>Artemisiospiza</i>         | 91.72214 | 808.79   | <i>Geothlypis</i>          | 92.5037  | 678.0407 | <i>Poecile</i>                   | 124.9264 | 783.984  |

|                               |          |          |                                 |          |          |                               |          |          |
|-------------------------------|----------|----------|---------------------------------|----------|----------|-------------------------------|----------|----------|
| <i>belli</i>                  |          |          | <i>trichas</i>                  |          |          | <i>atricapillus</i>           |          |          |
| <i>Athene cunicularia</i>     | 92.19483 | 719.4371 | <i>Grus americana</i>           | 120.0524 | 750.731  | <i>Pogoniulus pusillus</i>    | 83.65827 | 666.5252 |
| <i>Aythya fuligula</i>        | 112.4327 | 1176.881 | <i>Gymnogyps californianus</i>  | 106.9274 | 708.0411 | <i>Porphyrio hochstetteri</i> | 109.9283 | 760.8748 |
| <i>Balearica regulorum</i>    | 106.4168 | 681.646  | <i>Gypaetus barbatus</i>        | 97.27299 | 863.1569 | <i>Pseudopodoces humilis</i>  | 88.88077 | 696.8154 |
| <i>Branta canadensis</i>      | 113.2252 | 1038.528 | <i>Haemorhous mexicanus</i>     | 88.43043 | 750.4626 | <i>Pterocles gutturalis</i>   | 103.1053 | 742.2779 |
| <i>Bucorvus abyssinicus</i>   | 107.877  | 644.2602 | <i>Haliaeetus albicilla</i>     | 100.8902 | 698.3818 | <i>Pygoscelis adeliae</i>     | 101.2287 | 623.132  |
| <i>Calidris pugnax</i>        | 106.0496 | 732.0878 | <i>Haliaeetus leucocephalus</i> | 97.17203 | 658.3568 | <i>Pyrgilauda ruficollis</i>  | 89.63905 | 711.221  |
| <i>Callipepla californica</i> | 109.1642 | 924.3156 | <i>Harpia harpyja</i>           | 95.65704 | 686.7444 | <i>Rallus limicola</i>        | 107.2493 | 681.4457 |
| <i>Calypte anna</i>           | 77.9934  | 807.4208 | <i>Hemiprocne comata</i>        | 88.74224 | 654.3043 | <i>Rhea americana</i>         | 124.7388 | 734.8052 |
| <i>Camarhynchus parvulus</i>  | 100.9972 | 680.6774 | <i>Hirundo rustica</i>          | 98.31081 | 819.9243 | <i>Rhea pennata</i>           | 137.9937 | 847.4835 |
| <i>Caprimulgus europaeus</i>  | 104.0771 | 755.3881 | <i>Indicator indicator</i>      | 84.75043 | 924.8026 | <i>Rhynchotos jubatus</i>     | 108.8662 | 634.518  |
| <i>Cariama</i>                | 99.77049 | 687.632  | <i>Lagopus leucura</i>          | 94.51471 | 800.3078 | <i>Rissa</i>                  | 113.0016 | 677.2213 |

|                                            |          |          |                                          |          |          |                                       |          |          |
|--------------------------------------------|----------|----------|------------------------------------------|----------|----------|---------------------------------------|----------|----------|
| <i>cristata</i>                            |          |          |                                          |          |          | <i>tridactyla</i>                     |          |          |
| <i>Catharus</i><br><i>ustulatus</i>        | 90.5531  | 700.8832 | <i>Lagopus muta</i>                      | 97.26117 | 858.8854 | <i>Serinus</i><br><i>canaria</i>      | 89.15714 | 719.2229 |
| <i>Centrocercus</i><br><i>urophasianus</i> | 91.92871 | 782.4802 | <i>Laterallus</i><br><i>jamaicensis</i>  | 94.60144 | 595.7935 | <i>Setophaga</i><br><i>petechia</i>   | 94.30082 | 748.132  |
| <i>Chaetura</i><br><i>pelagica</i>         | 86.19375 | 659.2098 | <i>Lepidothrix</i><br><i>coronata</i>    | 91.2463  | 640.4926 | <i>Spheniscus</i><br><i>humboldti</i> | 124.8912 | 717.314  |
| <i>Chamaea</i><br><i>fasciata</i>          | 92.41261 | 737.4193 | <i>Lonchura striata</i>                  | 83.33208 | 693.0274 | <i>Sterna</i><br><i>hirundo</i>       | 115.9439 | 746.1276 |
| <i>Charadrius</i><br><i>vociferus</i>      | 103.7492 | 689.0631 | <i>Lycocorax</i><br><i>pyrrhopterus</i>  | 100.3216 | 617.7505 | <i>Streptopelia</i><br><i>turtur</i>  | 107.5025 | 724.8831 |
| <i>Chiroxiphia</i><br><i>lanceolata</i>    | 94.78807 | 672.6083 | <i>Malurus</i><br><i>melanocephalus</i>  | 82.55392 | 677.2147 | <i>Strigops</i><br><i>habroptila</i>  | 90.15739 | 614.98   |
| <i>Chlamydotis</i><br><i>macqueenii</i>    | 98.11193 | 837.3284 | <i>Manacus candei</i>                    | 94.49018 | 682.7179 | <i>Struthio</i><br><i>camelus</i>     | 119.3057 | 659.7553 |
| <i>Chrysolophus</i><br><i>pictus</i>       | 93.87255 | 775.0843 | <i>Manacus</i><br><i>vitellinus</i>      | 87.45607 | 611.5037 | <i>Sturnus</i><br><i>vulgaris</i>     | 85.34519 | 669.1712 |
| <i>Ciconia</i><br><i>maguari</i>           | 107.5645 | 658.5806 | <i>Melanerpes</i><br><i>formicivorus</i> | 84.18182 | 939.9114 | <i>Sylvia</i><br><i>atricapilla</i>   | 90.22243 | 747.5439 |
| <i>Colinus</i><br><i>virginianus</i>       | 107.5011 | 814.5916 | <i>Meleagris</i><br><i>gallopavo</i>     | 98.935   | 870.103  | <i>Sylvia borin</i>                   | 90.35905 | 738.0552 |
| <i>Coloeus</i>                             | 89.95385 | 620.2    | <i>Melopsittacus</i>                     | 76.72143 | 479.0607 | <i>Taeniopygia</i>                    | 85.98208 | 737.4849 |

|                                  |          |          |                                |          |          |                                 |          |          |
|----------------------------------|----------|----------|--------------------------------|----------|----------|---------------------------------|----------|----------|
| <i>monedula</i>                  |          |          | <i>undulatus</i>               |          |          | <i>guttata</i>                  |          |          |
| <i>Columba livia</i>             | 108.9351 | 694.9982 | <i>Melospiza georgiana</i>     | 133.519  | 694.4871 | <i>Tauraco erythrolophus</i>    | 105.7792 | 686.908  |
| <i>Corapipo altera</i>           | 90.87727 | 651.0636 | <i>Melospiza melodia</i>       | 179.936  | 614.7478 | <i>Theristicus caerulescens</i> | 109.7333 | 700.6975 |
| <i>Corvus brachyrhynchos</i>     | 85.10826 | 564.3651 | <i>Melozone crissalis</i>      | 240.0794 | 714.4922 | <i>Trogon surrucura</i>         | 103.5171 | 710.2291 |
| <i>Corvus cornix</i>             | 91.47282 | 611.3359 | <i>Merops nubicus</i>          | 91.0487  | 800.4652 | <i>Tympanuchus cupido</i>       | 97.53061 | 790.4878 |
| <i>Corvus hawaiiensis</i>        | 95.07565 | 653.3617 | <i>Molothrus ater</i>          | 94.35963 | 711.3229 | <i>Tyto alba</i>                | 101.7248 | 846.6256 |
| <i>Corvus kubaryi</i>            | 88.59906 | 595.2925 | <i>Motacilla alba</i>          | 94.1514  | 698.1981 | <i>Vidua chalybeata</i>         | 90.05556 | 803.7102 |
| <i>Corvus moneduloides</i>       | 91.57117 | 623.2523 | <i>Myiopsitta monachus</i>     | 88.44188 | 641.8205 | <i>Vidua macroura</i>           | 87.39286 | 799.0384 |
| <i>Coturnix japonica</i>         | 96.95591 | 846.0323 | <i>Myiozetetes cayanensis</i>  | 96.4287  | 714.3306 | <i>Zonotrichia albicollis</i>   | 84.71238 | 622.9476 |
| <i>Crossoptilon mantchuricum</i> | 94.53069 | 816.2614 | <i>Neopelma chrysocephalum</i> | 95.00702 | 627.4298 |                                 |          |          |
| <i>Cuculus canorus</i>           | 90.79831 | 584.5449 | <i>Nestor notabilis</i>        | 86.79333 | 558.68   |                                 |          |          |



**Table S8. Pairwise *p*-values of Z-DNA number in different regions upstream from a start codon.**

|       | 1 kb    | 2 kb    | 3 kb    | 4 kb    | 5 kb    | 6 kb    | 7 kb    | 8 kb    | 9 kb    |
|-------|---------|---------|---------|---------|---------|---------|---------|---------|---------|
| 2 kb  | 0.02372 | -       | -       | -       | -       | -       | -       | -       | -       |
| 3 kb  | 9.3e-14 | 1.2e-05 | -       | -       | -       | -       | -       | -       | -       |
| 4 kb  | < 2e-16 | 9.2e-14 | 9.3e-05 | -       | -       | -       | -       | -       | -       |
| 5 kb  | < 2e-16 | 8.9e-14 | 5.3e-07 | 0.99420 | -       | -       | -       | -       | -       |
| 6 kb  | < 2e-16 | < 2e-16 | 6.6e-14 | 0.00073 | 0.02947 | -       | -       | -       | -       |
| 7 kb  | < 2e-16 | < 2e-16 | 1.1e-13 | 4.1e-06 | 0.00050 | 0.98925 | -       | -       | -       |
| 8 kb  | < 2e-16 | < 2e-16 | 7.6e-14 | 0.00200 | 0.06103 | 1.00000 | 0.95743 | -       | -       |
| 9 kb  | < 2e-16 | < 2e-16 | 7.8e-14 | 0.00234 | 0.06808 | 1.00000 | 0.94894 | 1.00000 | -       |
| 10 kb | < 2e-16 | < 2e-16 | 9.8e-14 | 2.6e-07 | 5.1e-05 | 0.88065 | 0.99998 | 0.75715 | 0.73347 |
